# Supplementary material
Source: publisher figshare collection journal article supplement (https://geolsoc.figshare.com/ndownloader/files/30438341)
Supplement: Supplementary file 1 [file 30438341]

**Cl pictures of zircons from lamproite dyke 1 (Ingashi)**

**

Group of zircons No 1. Ages: 293-357 Ma**

No 62 (at the bottom, on left) and 63 (at the top, on right) (Ages 293.1 and 353.9)





No 149 (on left) and 150 (on right) (Ages 357.4 and 300.5)





No 55 (at the top, on left) and 59 (at the top, on right) (Ages 315.7 and 355.7)





No 83 (at the bottom, in the center) (Ages 318.9)





No 167 (on right) (Ages 327.9)





No 87 (at the top, on left) (Ages 339.2)





No 96 (at the bottom, in the center) (Ages 340.7)





No 109 (in the center) (Ages 343.6)

**Group of zircons No 2. Ages: 384-505 Ma**



No 44 (at the bottom, on left) (Ages 384.8)





No 56 (at the bottom, in the center) and 58 (at the top, in the center) (Ages 462.9 and 430.9)



 No 84 (at the top, on right) (Ages 439.3)





No 48 (at the top, on left) (Ages 455.2)





No 105 (at the bottom) (Ages 455.4)





No 90 (on right) (Ages 461.5)





No 22 (at the top, on left) and 23 (at the top, on right) (Ages 480.3 and 462.4)





No 126 (at the bottom, on right) (Ages 475.9)





No 21 (on right) (Ages 482.2)



 No 132 (at the bottom, on left, line 1) (Ages 490.6)





No 10

(Ages 501.6)





No 117 (at the bottom, on left) (Ages 505.4)

**Group of zircons No 3. Ages: 550-1104 Ma**





No 133 (at the bottom, on left, line 2) and 139 (at the top, on right, line 1) (Ages 642.7 and 550.5)





No 116 (on right) (Ages 725.1)





No 28 (at the bottom, on left) and 33 (on right) (Ages 833.8 and 760.7)





No 95 (at the top, in the center) (Ages 772.2)





No 180

(Ages 772.4)





No 50 (at the top, on right) (Ages 786.1)





No 25

(Ages 809.4)





No 20 (at the bottom, on right) (Ages 822.8)

**Group of zircons No 4. Ages: 1741-1856 Ma**





No 05

(Ages 1741)




No 17

(Ages 1750.2)



No 01 (on left) and 02 (on right) (Ages: 1813.1 and 1779.8)





No 67 (at the top) (Ages 1793.1)





No 42 (at the top, on right) and 45 (at the bottom, on right) (Ages 1795.2 and 1809.3)





No 143 (at the bottom, in the center) (Ages 1812)





No 111 (at the bottom, in the center) (Ages 1830.4)





No 29 (at the top, on left) (Ages 1832.7)





No 91 (on left) (Ages 1834.5)





No 129

(Ages 1852.2)





No 131

(Ages 1856.5)

**Group of zircons No 5. Ages: 2000-2461 Ma**



No 151 (at the top, on left) (Ages 2000.8)





No 118 (at the top, on left) (Ages 2018.1)
